# Supplementary material
Source: PubMed Central journal article supplement (PMC3127049)

# Supplementary Figure 1

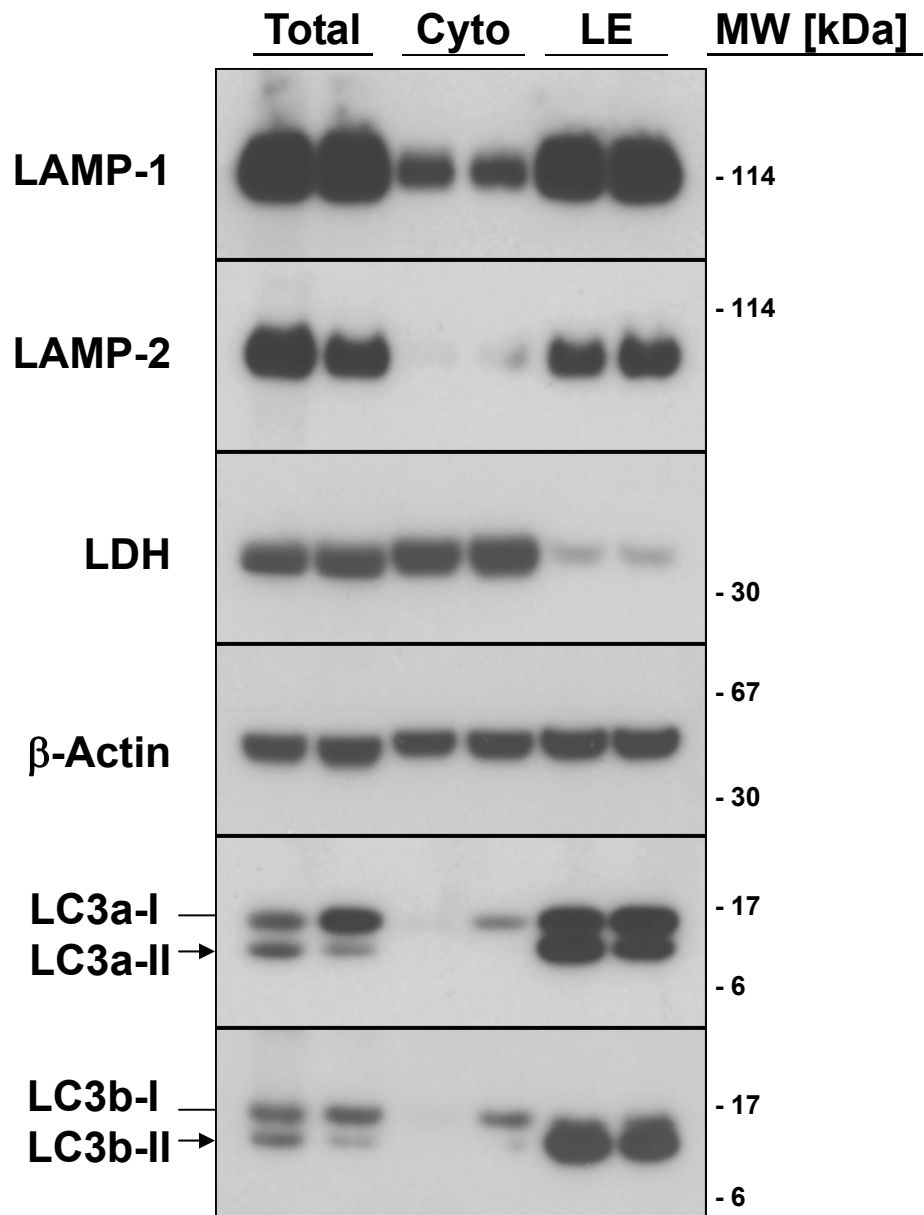

## Supplementary Figure 2

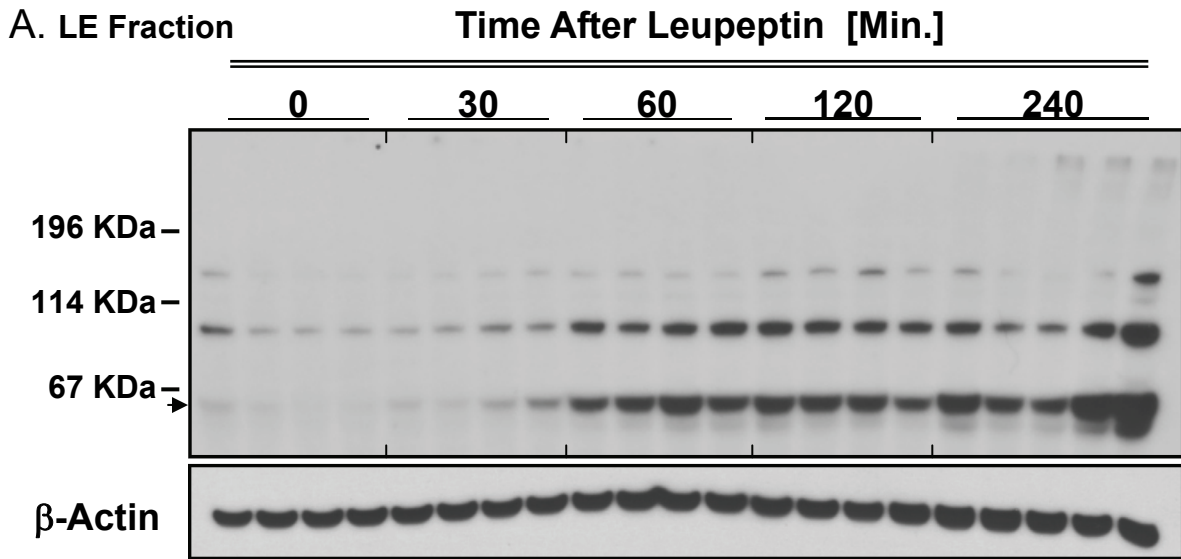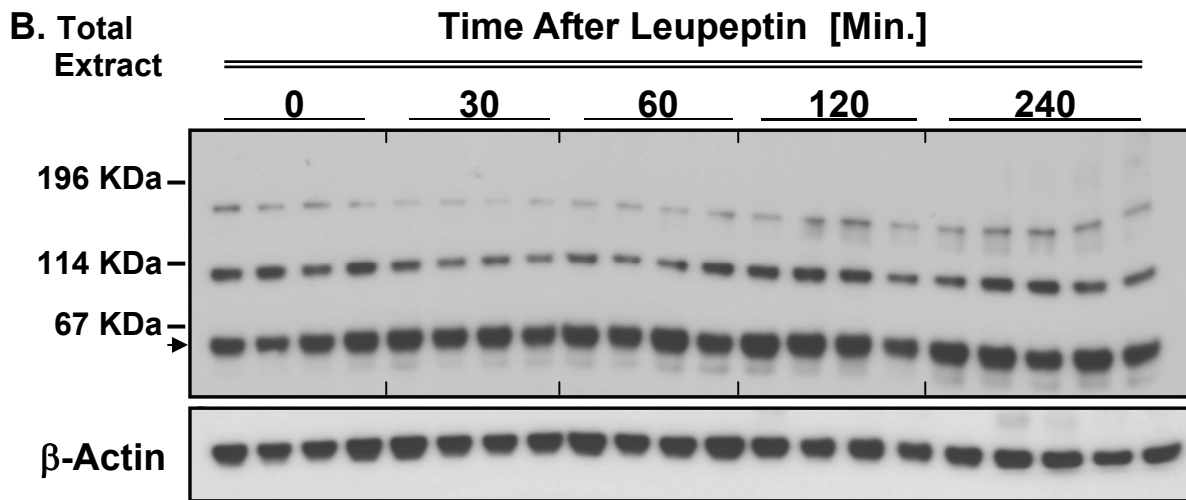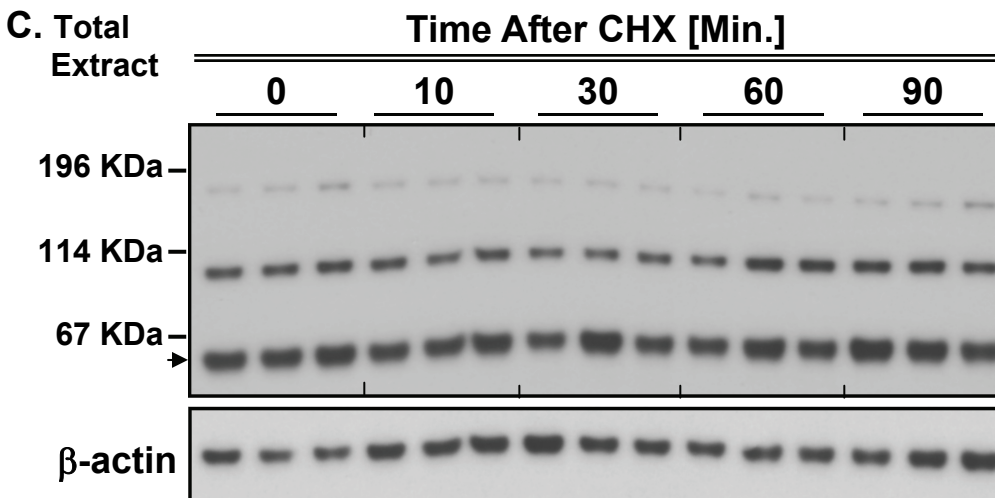

### Supplementary Figure 3

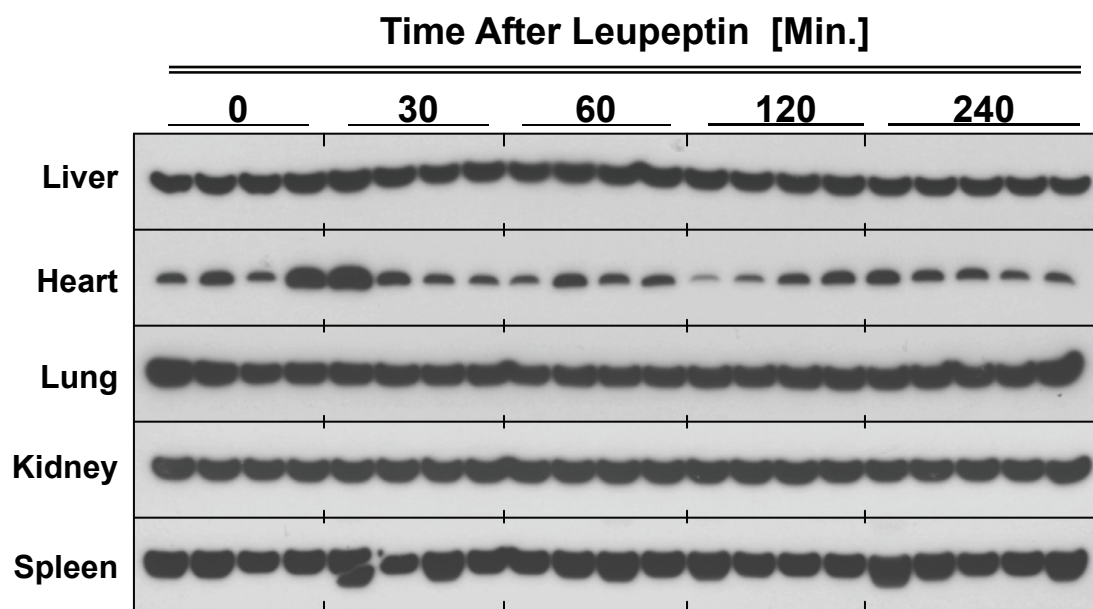

# Supplementary Figure 4

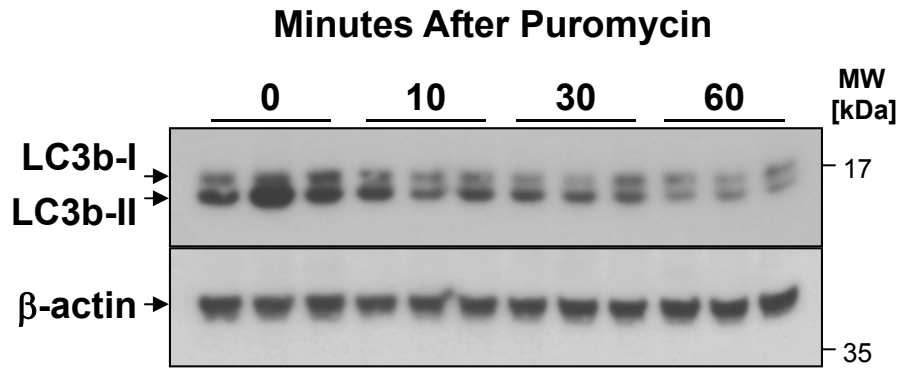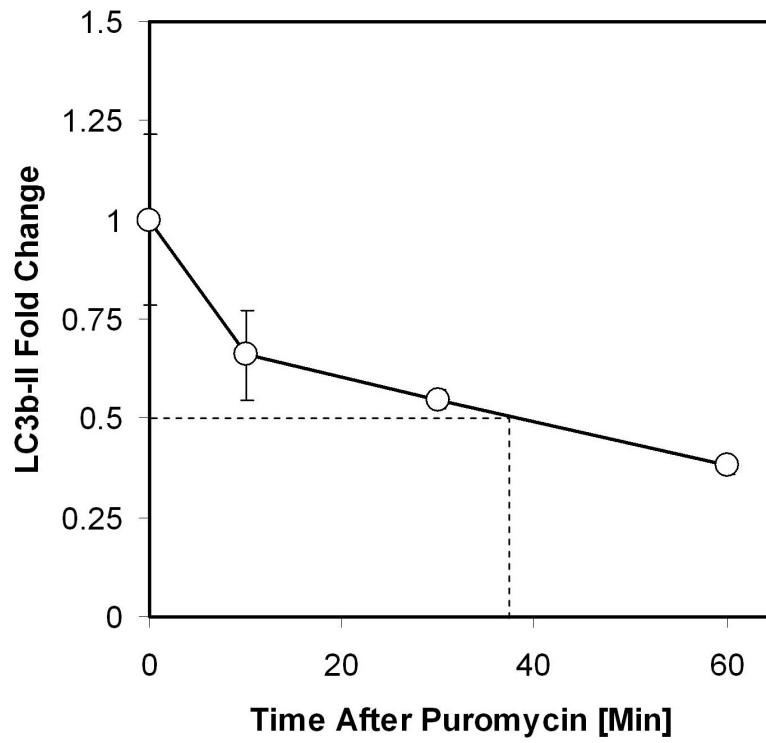

# Supplementary Figure 5

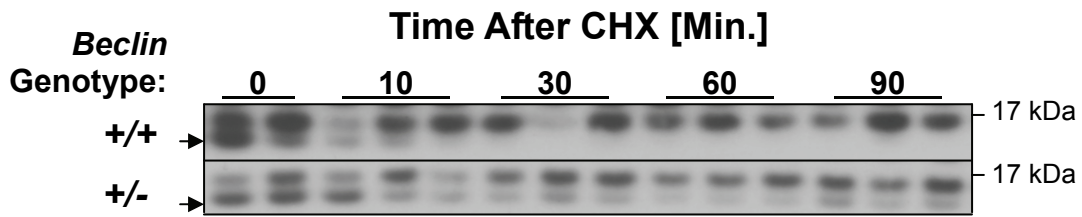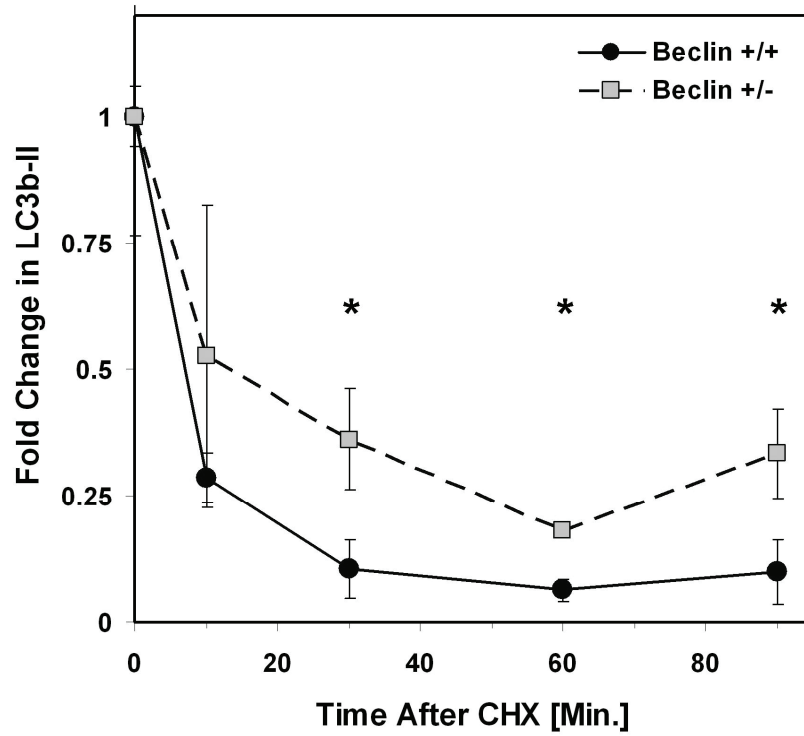

## Supplementary Figure S6

### A. PCR Genotyping

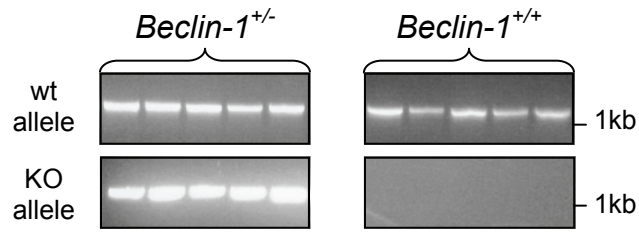

### B. RT-PCR

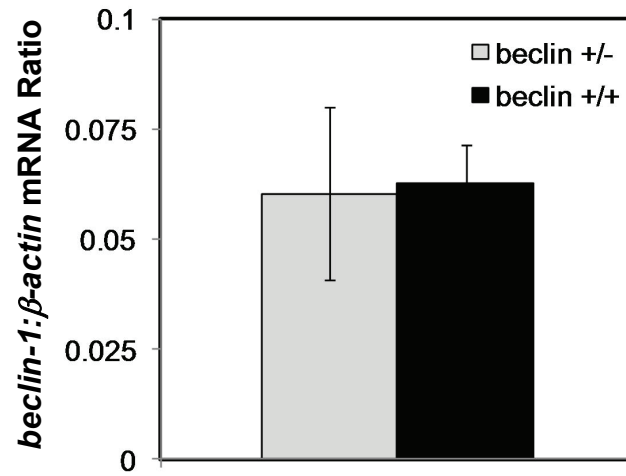

### C. Protein Expression

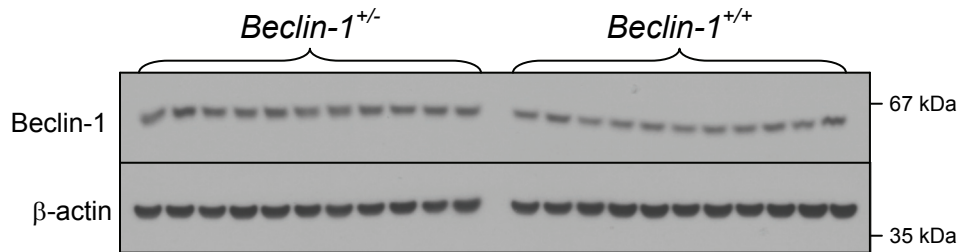

Supplement: auto0706_0629SD1.pdf [file auto0706_0629SD1.pdf]
